# Supplementary material for: Evaluation of associations between estimates of particulate matter exposure and new onset type 2 diabetes in the REGARDS cohort
Source: PubMed Central journal article supplement (PMC9012798; doi:10.1038/s41370-021-00391-9), 2021-10-16
Supplement: NIHMS1743779-supplement-1.pdf [file NIHMS1743779-supplement-1.pdf]

**Table S1.** Estimated odd ratios and 95% confidence interval of new onset diabetes per 5 ug/m<sup>3</sup> increase of PM<sub>2.5</sub>, by community type, exposure source and durations of 2 weeks and 30 days (n = 11,208). Models fitted using GEE with robust standard errors adjusted for age (centered and centered-squared), race, gender, income category, smoking status, annual average temperature, and region of REGARDS study, clustered on Census tract.

| Exposure source and duration | Odds Ratio (95 % CI)                |                                    |                                    |                      |
|------------------------------|-------------------------------------|------------------------------------|------------------------------------|----------------------|
|                              | Higher density urban<br>(n = 1,807) | Lower density urban<br>(n = 4,527) | Suburban/small town<br>(n = 2,224) | Rural<br>(n = 2,650) |
| <b>CDC WONDER</b>            |                                     |                                    |                                    |                      |
| 2 weeks                      | 0.96 (0.81, 1.13)                   | 0.96 (0.86, 1.06)                  | 1.08 (0.92, 1.28)                  | 1.09 (0.94, 1.27)    |
| 30 days                      | 0.99 (0.82, 1.20)                   | 1.01 (0.89, 1.15)                  | 1.12 (0.93, 1.35)                  | 1.09 (0.91, 1.30)    |
| <b>Downscaler</b>            |                                     |                                    |                                    |                      |
| 2 weeks                      | 0.97 (0.81, 1.16)                   | 0.93 (0.83, 1.04)                  | 1.13 (0.94, 1.35)                  | 1.13 (0.96, 1.34)    |
| 30 days                      | 0.98 (0.79, 1.21)                   | 0.97 (0.84, 1.11)                  | 1.15 (0.94, 1.41)                  | 1.17 (0.96, 1.42)    |

**Table S2.** Spearman correlation coefficients for Downscaler PM<sub>2.5</sub> estimates with exposure durations of 1, 2, 3, and 4 years among participants enrolled in 2005, 2006 and 2007 (n = 5,961).

| Duration       | 1 year | 2 years | 3 years | 4 years |
|----------------|--------|---------|---------|---------|
| <b>1 year</b>  | 1.00   |         |         |         |
| <b>2 years</b> | 0.98   | 1.00    |         |         |
| <b>3 years</b> | 0.96   | 0.99    | 1.00    |         |
| <b>4 years</b> | 0.94   | 0.98    | 0.99    | 1.00    |

**Table S3.** Estimated odd ratios and 95% confidence interval of new onset diabetes per 5 ug/m<sup>3</sup> increase of PM<sub>2.5</sub>, by community type and exposure duration of 3 (n = 9,277) years from the Downscaler model. Model was fit using GEE with robust standard errors adjusted for age (centered and centered-squared), race, gender, income category, smoking status, annual average temperature, and region of REGARDS study, clustered on Census tract.

| Exposure source and duration | Odds Ratio (95 % CI)                |                                    |                                    |                      |
|------------------------------|-------------------------------------|------------------------------------|------------------------------------|----------------------|
|                              | Higher density urban<br>(n = 1,471) | Lower density urban<br>(n = 3,717) | Suburban/small town<br>(n = 1,854) | Rural<br>(n = 2,235) |
| <b>Downscaler</b>            |                                     |                                    |                                    |                      |
| 3 years                      | 0.89 (0.60, 1.31)                   | 1.06 (0.81, 1.39)                  | 1.42 (0.93, 2.18)                  | 1.66 (1.03, 2.65)    |
